# Supplementary material for: Molecular Signature for Lymphatic Invasion Associated with Survival of Epithelial Ovarian Cancer
Source: PubMed Central journal article supplement — Cancer Res Treat. 2017 May 22;50(2):461–73. doi: 10.4143/crt.2017.104 (PMC5912145; doi:10.4143/crt.2017.104), 2017-05-22
Supplement: crt-2017-104-suppl3.pdf [file crt-2017-104-suppl3.pdf]

**S3 Table.** Meta-analysis of genes selected for overall survival

| mRNA associated with lymphatic invasion | HR   | 95% CI    |
|-----------------------------------------|------|-----------|
| HTR3A                                   | 0.95 | 0.89-1.00 |
| PCP4                                    | 1.03 | 0.98-1.09 |
| CAPN9                                   | 0.93 | 0.88-0.98 |
| MASP1                                   | 1.00 | 0.94-1.06 |
| CYP8B1                                  | 0.99 | 0.91-1.07 |
| GDF5                                    | 1.04 | 0.98-1.10 |
| AOAH                                    | 1.02 | 0.96-1.08 |
| ADORA3                                  | 1.05 | 1.00-1.11 |
| CLCNKB                                  | 1.05 | 0.98-1.12 |
| EBI3                                    | 0.96 | 0.90-1.01 |
| LILRB3                                  | 0.95 | 0.83-1.10 |
| C16orf54                                | 0.94 | 0.87-1.02 |
| PODNL1                                  | 1.10 | 1.04-1.17 |
| DCN                                     | 1.18 | 1.12-1.25 |
| USH2A                                   | 1.04 | 0.98-1.10 |
| FGD2                                    | 0.97 | 0.91-1.02 |
| TNFAIP8L2                               | 0.96 | 0.89-1.03 |
| SP140                                   | 0.94 | 0.89-1.00 |
| WISP1                                   | 1.12 | 1.06-1.19 |
| SH2D4B                                  | 1.00 | 0.93-1.08 |
| RUNX1                                   | 1.07 | 1.01-1.13 |

HR, hazard ratio; CI, confidence interval.
