# Supplementary material for: Molecular Signature for Lymphatic Invasion Associated with Survival of Epithelial Ovarian Cancer
Source: PubMed Central journal article supplement — Cancer Res Treat. 2017 May 22;50(2):461–73. doi: 10.4143/crt.2017.104 (PMC5912145; doi:10.4143/crt.2017.104), 2017-05-22
Supplement: crt-2017-104-suppl4.pdf [file crt-2017-104-suppl4.pdf]

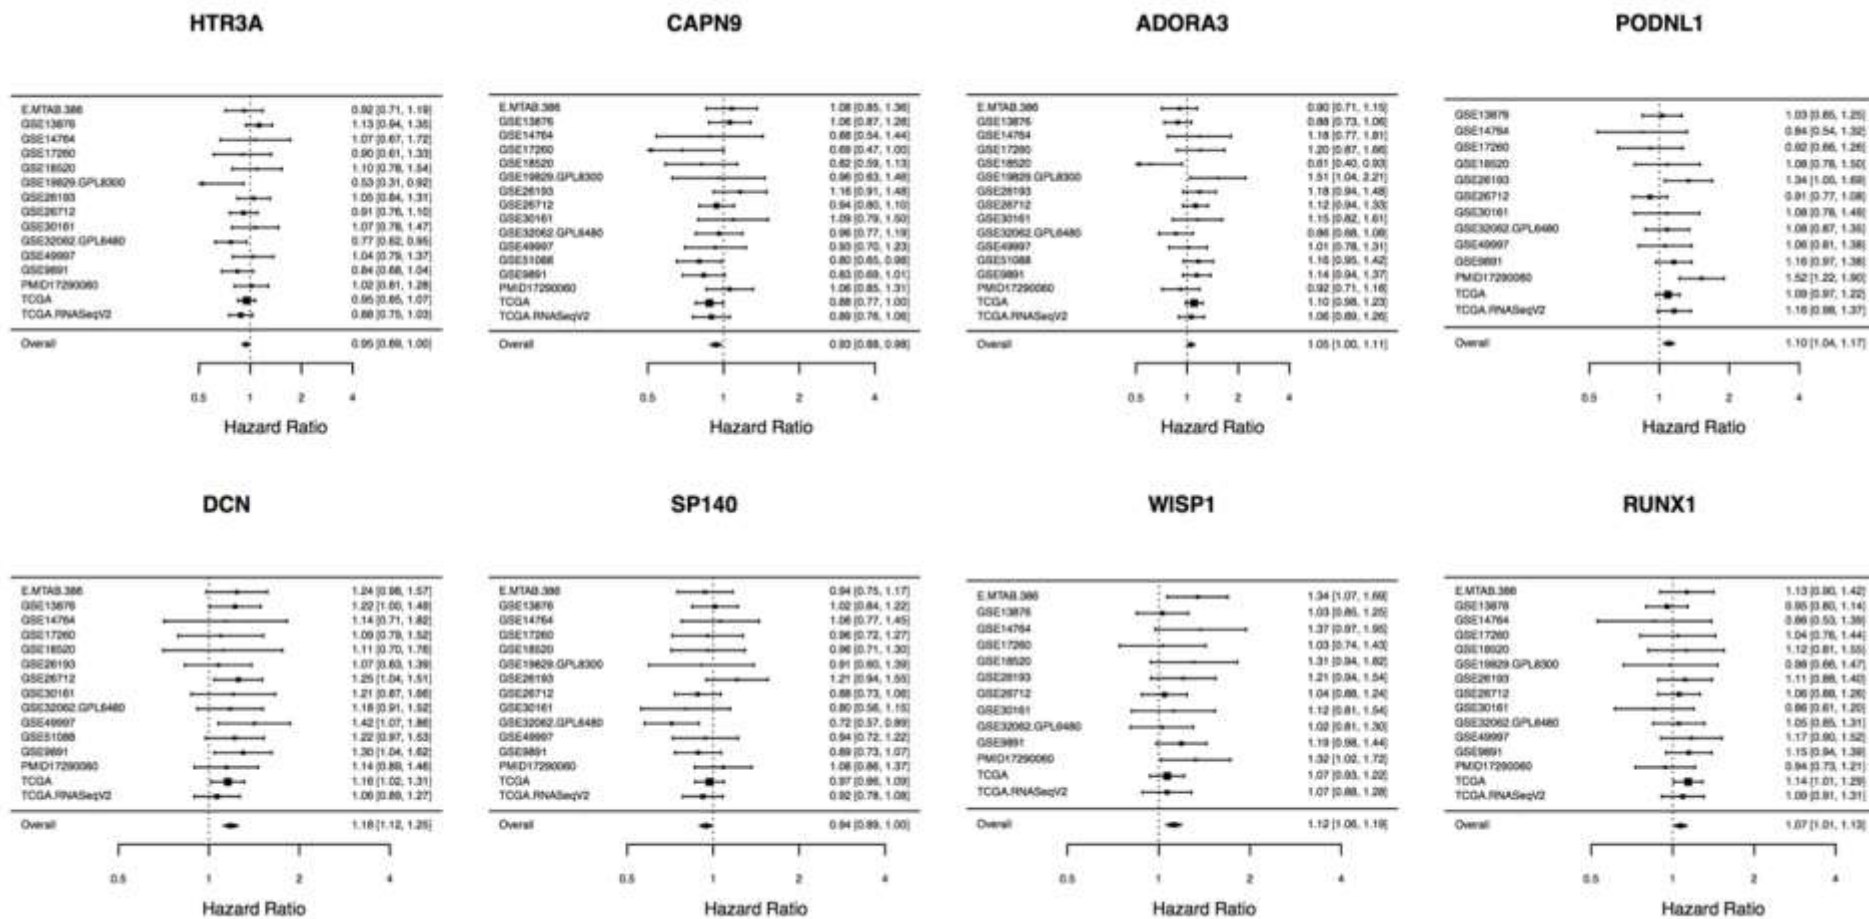

**S4 Fig.** Validation of the genes selected using curatedOvarianData database. Eight of the 21 genes had clinical significance on patient's survival.
